# Supplementary material
Source: PubMed Central journal article supplement (PMC5823259)

## **Figure Legends**

### **Figure 1. Hong Kong Liver Cancer staging**

The Hong Kong Liver Cancer staging scheme as proposed by Yau et al (2014).

### **Figure 2. Kaplan-Meier Curves**

Stratification by BCLC staging (A), HKLC-5 staging (B) and HKLC-9 staging (C). All three staging systems demonstrate separation of survival curves. The HKLC-9 staging has several overlaps, notably in stages IIIa, IIIb, IVa, and Va. Number at risk tables are attached below each subfigure.

### **Figure 3. Calibration plots for HKLC-5 and HKLC-9**

Calibration plots for HKLC-9 (A) and for HKLC-5 (B). They plot the validation cohort patients' actual survival time (y-axis) versus the HKLC staging system's predicted survival (x-axis). The closer points are to the reference line (blue), the better the calibration. The dotted line represents the least-squares trendline. Both HKLC-9 and HKLC-5 demonstrate moderate to good calibration with  $R^2 = 0.9055$  and  $R^2 = 0.9510$ , respectively.

### **Supplemental Figure 1. Kaplan-Meier Curves for HBV and HCV sub-cohorts**

Stratification by BCLC staging (A), HKLC-9 staging (C) and HKLC-5 staging (E) in HBV cohort. Stratification by BCLC staging (B), HKLC-9 staging (D) and HKLC-5 staging (F) in HCV cohort. Same color coding as figure 2. Number at risk tables provided (supplemental table 2).

### **Supplemental Figure 2. Kaplan-Meier Curves for pre and post-2008 subcohorts**

Stratification by BCLC staging (A), HKLC-9 staging (C) and HKLC-5 staging (E) in HBV cohort. Stratification by BCLC staging (B), HKLC-9 staging (D) and HKLC-5 staging (F) in HCV cohort. Same color coding as figure 2. Number at risk tables provided (supplemental table 3).

**Supplemental Figure 3. Kaplan-Meier Curves for pre and post-2008 subcohorts (confirmed dead patients only)**

Same labeling as Supplemental Figure 2.

**Supplemental Table 1. Number of Patients on Cross-Tabulation by HKLC and BCLC**

|                   | <b>BCLC A</b> | <b>BCLC B</b> | <b>BCLC C</b> | <b>BCLC D</b> | <b>Total HKLC</b> |
|-------------------|---------------|---------------|---------------|---------------|-------------------|
| <b>HKLC I</b>     | 77            | 19            | 4             | 0             | 100               |
| <b>HKLC II</b>    | 55            | 61            | 145           | 0             | 261               |
| IIa               | 25            | 4             | 76            | 0             | 105               |
| IIb               | 30            | 57            | 69            | 0             | 156               |
| <b>HKLC III</b>   | 5             | 64            | 193           | 0             | 262               |
| IIIa              | 5             | 16            | 42            | 0             | 63                |
| IIIb              | 0             | 48            | 151           | 0             | 199               |
| <b>HKLC IV</b>    | 0             | 2             | 162           | 0             | 164               |
| IVa               | 0             | 1             | 84            | 0             | 85                |
| IVb               | 0             | 1             | 78            | 0             | 79                |
| <b>HKLC V</b>     | 0             | 0             | 32            | 62            | 94                |
| Va                | 0             | 0             | 7             | 15            | 22                |
| Vb                | 0             | 0             | 25            | 47            | 72                |
| <b>Total BCLC</b> | 137           | 146           | 536           | 62            |                   |

**Supplemental Table 2. Number At Risk Table for HBV, HCV subcohorts**

**<HBV subcohort>**

| <b>Stage\Months</b> | <b>0</b> | <b>10</b> | <b>20</b> | <b>30</b> | <b>40</b> | <b>50</b> | <b>60</b> |
|---------------------|----------|-----------|-----------|-----------|-----------|-----------|-----------|
| <b>BCLC A</b>       | 22       | 19        | 15        | 15        | 12        | 9         | 8         |
| <b>BCLC B</b>       | 21       | 14        | 10        | 3         | 1         | 1         | 0         |
| <b>BCLC C</b>       | 83       | 39        | 20        | 14        | 8         | 4         | 2         |
| <b>BCLC D</b>       | 6        | 1         | 1         | 0         | 0         | 0         | 0         |
| <b>HKLC I</b>       | 14       | 13        | 10        | 10        | 9         | 7         | 6         |
| <b>HKLC II</b>      | 42       | 31        | 20        | 16        | 9         | 5         | 2         |
| <b>HKLC III</b>     | 34       | 19        | 13        | 4         | 2         | 1         | 1         |
| <b>HKLC IV</b>      | 31       | 8         | 2         | 2         | 1         | 1         | 1         |
| <b>HKLC V</b>       | 11       | 2         | 1         | 0         | 0         | 0         | 0         |
| <b>HKLC I</b>       | 14       | 13        | 10        | 10        | 9         | 7         | 6         |
| <b>HKLC IIa</b>     | 14       | 10        | 5         | 4         | 3         | 0         | 0         |
| <b>HKLC IIb</b>     | 28       | 21        | 15        | 12        | 6         | 5         | 2         |
| <b>HKLC IIIa</b>    | 5        | 4         | 4         | 2         | 1         | 1         | 1         |
| <b>HKLC IIIb</b>    | 29       | 15        | 9         | 2         | 1         | 0         | 0         |
| <b>HKLC IVa</b>     | 22       | 7         | 2         | 2         | 1         | 1         | 1         |
| <b>HKLC IVb</b>     | 9        | 1         | 0         | 0         | 0         | 0         | 0         |
| <b>HKLC Va</b>      | 3        | 1         | 1         | 0         | 0         | 0         | 0         |
| <b>HKLC Vb</b>      | 8        | 1         | 0         | 0         | 0         | 0         | 0         |

**<HCV Subcohort>**

| <b>Stage\Months</b> | <b>0</b> | <b>10</b> | <b>20</b> | <b>30</b> | <b>40</b> | <b>50</b> | <b>60</b> |
|---------------------|----------|-----------|-----------|-----------|-----------|-----------|-----------|
| <b>BCLC A</b>       | 79       | 53        | 39        | 27        | 20        | 15        | 11        |
| <b>BCLC B</b>       | 78       | 44        | 27        | 12        | 6         | 5         | 3         |
| <b>BCLC C</b>       | 238      | 100       | 53        | 27        | 18        | 12        | 10        |
| <b>BCLC D</b>       | 37       | 6         | 4         | 4         | 4         | 1         | 1         |
| <b>HKLC I</b>       | 67       | 40        | 32        | 26        | 18        | 13        | 10        |
| <b>HKLC II</b>      | 114      | 82        | 46        | 23        | 17        | 12        | 8         |
| <b>HKLC III</b>     | 130      | 51        | 28        | 11        | 5         | 5         | 4         |
| <b>HKLC IV</b>      | 70       | 21        | 12        | 5         | 3         | 1         | 1         |
| <b>HKLC V</b>       | 51       | 9         | 5         | 5         | 5         | 2         | 2         |
| <b>HKLC I</b>       | 67       | 40        | 32        | 26        | 18        | 13        | 10        |
| <b>HKLC IIa</b>     | 63       | 46        | 26        | 14        | 10        | 6         | 4         |
| <b>HKLC IIb</b>     | 51       | 36        | 20        | 9         | 7         | 6         | 4         |
| <b>HKLC IIIa</b>    | 36       | 18        | 12        | 5         | 2         | 2         | 1         |
| <b>HKLC IIIb</b>    | 94       | 33        | 16        | 6         | 3         | 3         | 3         |
| <b>HKLC IVa</b>     | 30       | 9         | 4         | 2         | 1         | 0         | 0         |
| <b>HKLC IVb</b>     | 40       | 12        | 8         | 3         | 2         | 1         | 1         |
| <b>HKLC Va</b>      | 14       | 5         | 4         | 4         | 4         | 2         | 2         |
| <b>HKLC Vb</b>      | 37       | 4         | 1         | 1         | 1         | 0         | 0         |

**Supplemental Table 3. Number At Risk Table for pre and post-2008 subcohorts**

**<pre-2008 subcohort>**

| <b>Stage\Months</b> | <b>0</b> | <b>10</b> | <b>20</b> | <b>30</b> | <b>40</b> | <b>50</b> | <b>60</b> |
|---------------------|----------|-----------|-----------|-----------|-----------|-----------|-----------|
| <b>BCLC A</b>       | 50       | 41        | 34        | 30        | 26        | 19        | 15        |
| <b>BCLC B</b>       | 49       | 31        | 26        | 14        | 10        | 9         | 6         |
| <b>BCLC C</b>       | 202      | 102       | 54        | 32        | 27        | 22        | 18        |
| <b>BCLC D</b>       | 4        | 2         | 2         | 2         | 1         | 1         | 1         |
| <b>HKLC I</b>       | 28       | 25        | 20        | 17        | 16        | 13        | 11        |
| <b>HKLC II</b>      | 95       | 74        | 55        | 40        | 31        | 24        | 17        |
| <b>HKLC III</b>     | 120      | 56        | 31        | 15        | 13        | 11        | 9         |
| <b>HKLC IV</b>      | 51       | 19        | 8         | 4         | 3         | 2         | 2         |
| <b>HKLC V</b>       | 33       | 4         | 2         | 2         | 2         | 1         | 1         |
| <b>HKLC I</b>       | 28       | 25        | 20        | 17        | 16        | 13        | 11        |
| <b>HKLC IIa</b>     | 25       | 19        | 14        | 12        | 10        | 5         | 5         |
| <b>HKLC IIb</b>     | 70       | 55        | 41        | 28        | 21        | 19        | 12        |
| <b>HKLC IIIa</b>    | 27       | 13        | 8         | 6         | 6         | 5         | 3         |
| <b>HKLC IIIb</b>    | 93       | 43        | 23        | 9         | 7         | 6         | 6         |
| <b>HKLC IVa</b>     | 28       | 12        | 5         | 2         | 1         | 1         | 1         |
| <b>HKLC IVb</b>     | 23       | 7         | 3         | 2         | 2         | 1         | 1         |
| <b>HKLC Va</b>      | 10       | 3         | 2         | 2         | 2         | 1         | 1         |
| <b>HKLC Vb</b>      | 23       | 1         | 0         | 0         | 0         | 0         | 0         |

**<post-2008 Subcohort>**

| <b>Stage\Months</b> | <b>0</b> | <b>10</b> | <b>20</b> | <b>30</b> | <b>40</b> | <b>50</b> | <b>60</b> |
|---------------------|----------|-----------|-----------|-----------|-----------|-----------|-----------|
| <b>BCLC A</b>       | 87       | 54        | 37        | 25        | 18        | 11        | 8         |
| <b>BCLC B</b>       | 97       | 54        | 33        | 15        | 6         | 4         | 1         |
| <b>BCLC C</b>       | 333      | 146       | 69        | 34        | 16        | 6         | 3         |
| <b>BCLC D</b>       | 36       | 5         | 4         | 3         | 3         | 0         | 0         |
| <b>HKLC I</b>       | 72       | 43        | 32        | 26        | 16        | 9         | 7         |
| <b>HKLC II</b>      | 166      | 113       | 63        | 33        | 18        | 11        | 4         |
| <b>HKLC III</b>     | 141      | 54        | 29        | 8         | 2         | 0         | 0         |
| <b>HKLC IV</b>      | 113      | 38        | 14        | 6         | 3         | 0         | 0         |
| <b>HKLC V</b>       | 61       | 11        | 5         | 4         | 4         | 1         | 1         |
| <b>HKLC I</b>       | 72       | 43        | 32        | 26        | 16        | 9         | 7         |
| <b>HKLC IIa</b>     | 80       | 55        | 29        | 16        | 10        | 6         | 3         |
| <b>HKLC IIb</b>     | 86       | 58        | 34        | 17        | 8         | 5         | 1         |
| <b>HKLC IIIa</b>    | 36       | 16        | 12        | 4         | 0         | 0         | 0         |
| <b>HKLC IIIb</b>    | 105      | 38        | 17        | 4         | 2         | 0         | 0         |
| <b>HKLC IVa</b>     | 57       | 21        | 7         | 4         | 2         | 0         | 0         |
| <b>HKLC IVb</b>     | 56       | 17        | 7         | 2         | 1         | 0         | 0         |
| <b>HKLC Va</b>      | 12       | 5         | 4         | 3         | 3         | 1         | 1         |
| <b>HKLC Vb</b>      | 49       | 6         | 1         | 1         | 1         | 0         | 0         |

a) BCLC on HBV

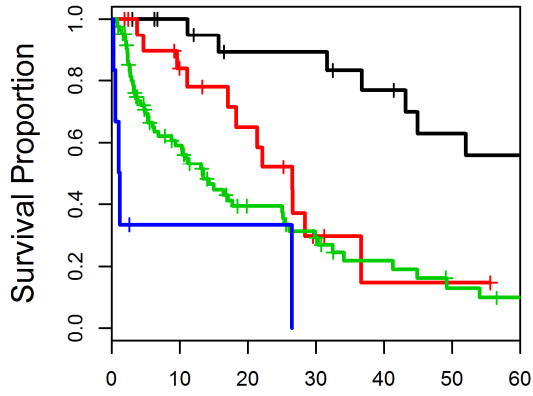

b) BCLC on HCV

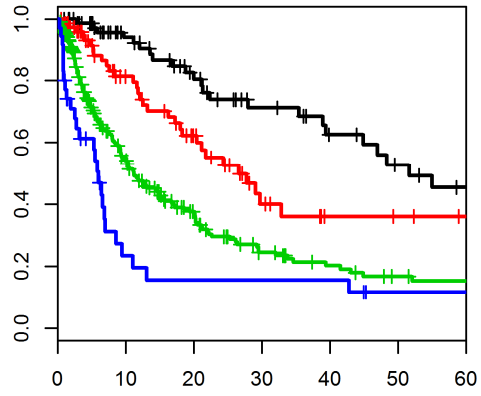

c) HKLC-9 on HBV

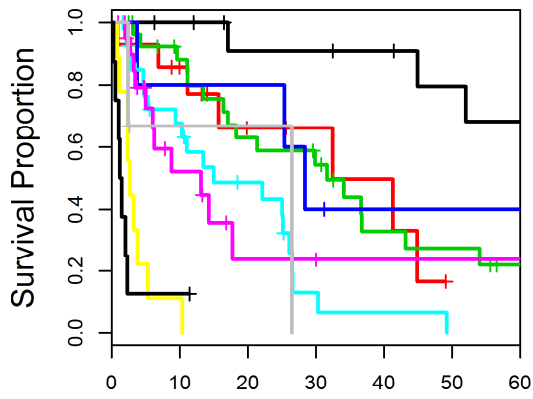

d) HKLC-9 on HCV

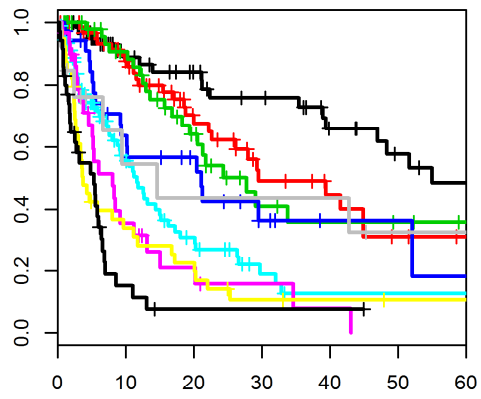

e) HKLC-5 on HBV

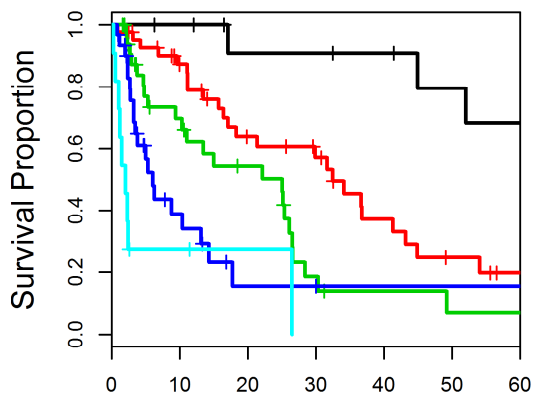

f) HKLC-5 on HCV

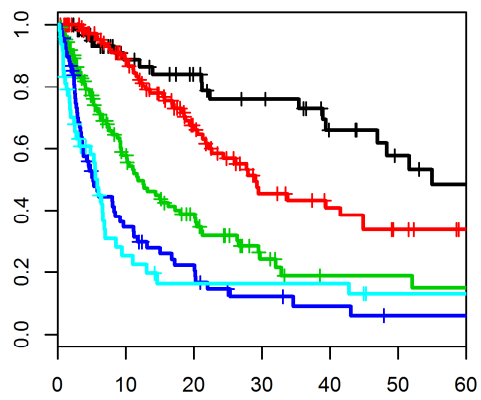

a) BCLC before 2008

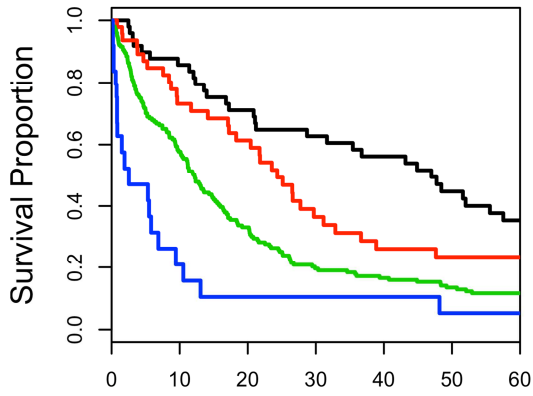

b) BCLC after 2008

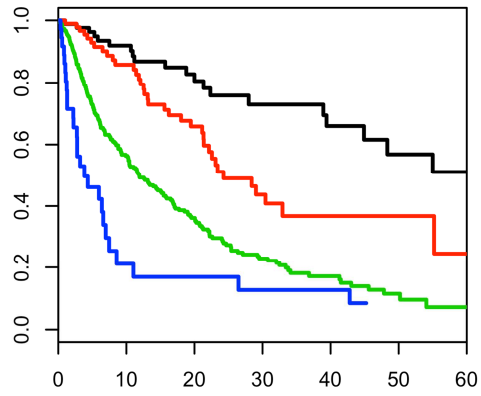

c) HKLC-9 before 2008

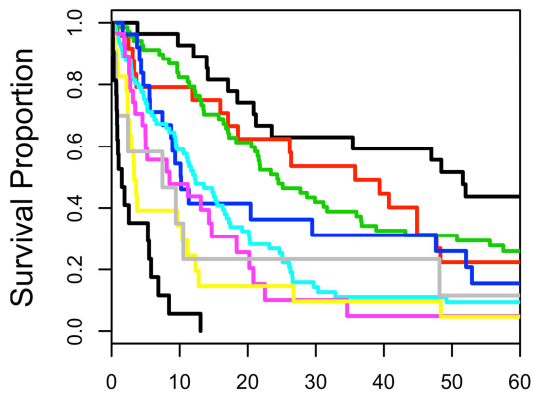

d) HKLC-9 after 2008

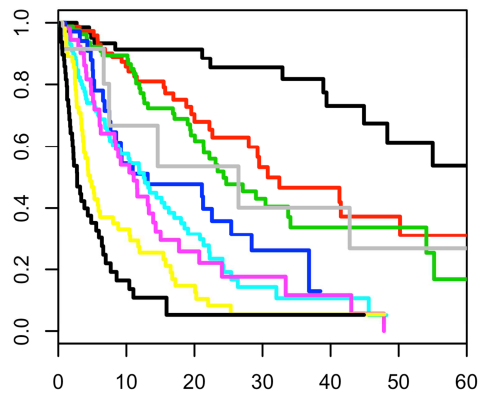

e) HKLC-5 before 2008

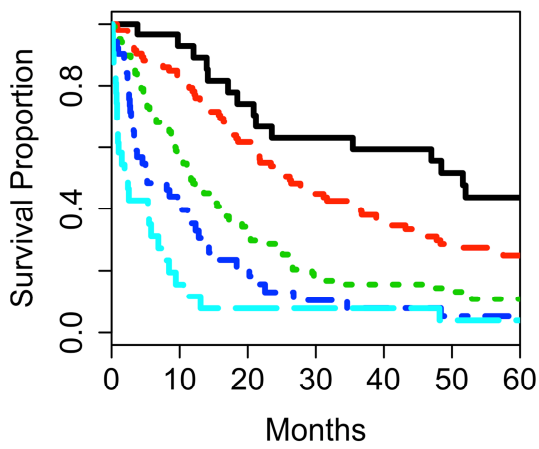

f) HKLC-5 after 2008

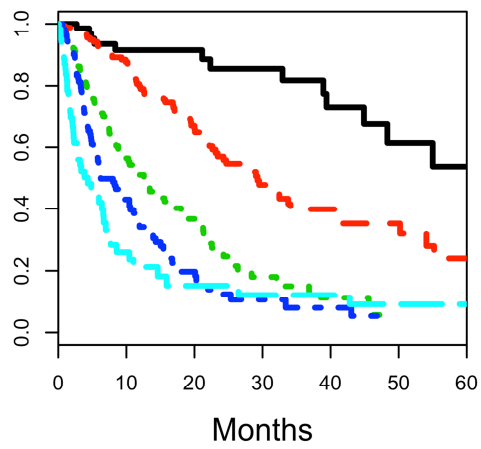

a) BCLC pre-2008 confirmed dead only

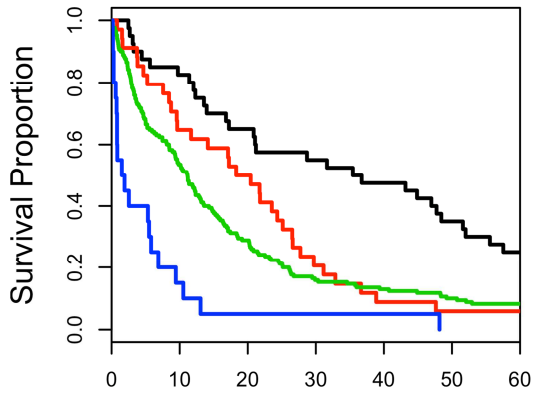

b) BCLC pre-2008 confirmed dead only

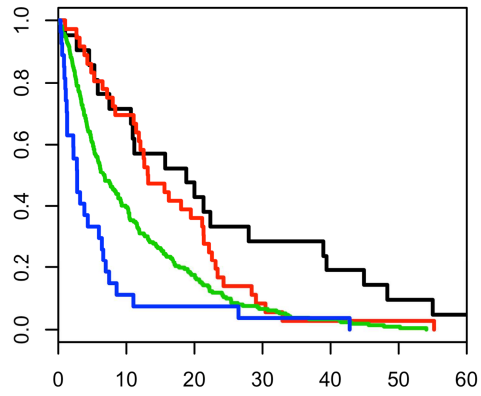

c) HKLC-9 pre-2008 confirmed dead only

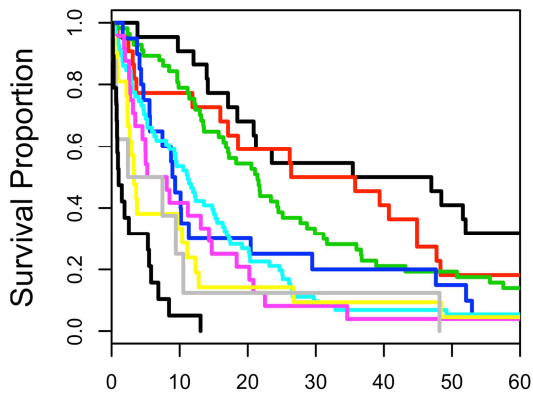

d) HKLC-9 post-2008 confirmed dead only

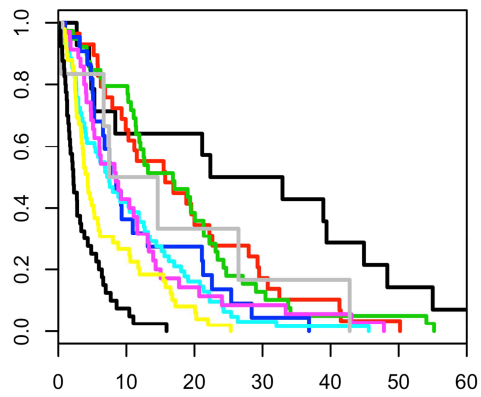

e) HKLC-5 post-2008 confirmed dead only

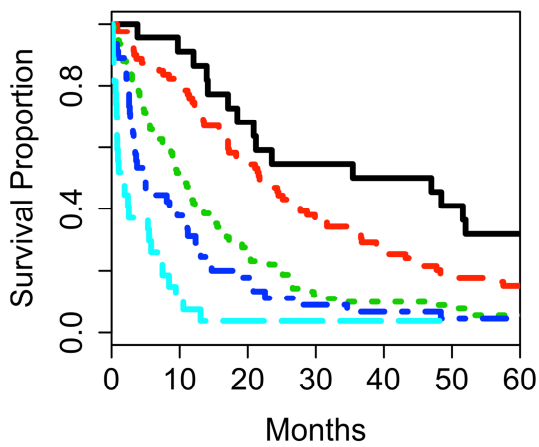

f) HKLC-5 post-2008 confirmed dead only

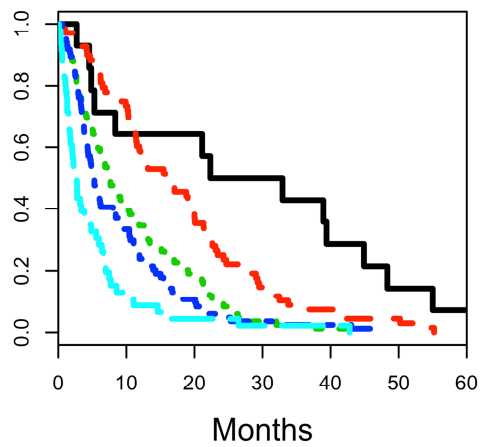

Supplement: NIHMS829722-supplement-supplement_1.pdf [file NIHMS829722-supplement-supplement_1.pdf]
